# Supplementary material
Source: publisher site journal article supplement (https://www.spandidos-publications.com/1340/downloadSupplementary)
Supplement: Supplementary file 1 [file downloadSupplementary]

Figure S1. Transfection efficiency of miR-370-3p as determined via reverse transcription-quantitative PCR. DDP, cisplatin; miR, microRNA; NC, negative control.

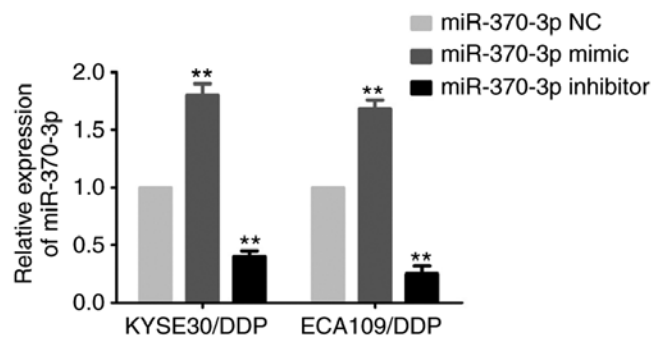

Table SI. Clinicopathologic characteristics of patients.

| Patient | Age | Sex  | Smoking | Drink | TNM stage    | Pathological stage |
|---------|-----|------|---------|-------|--------------|--------------------|
| 1       | 65  | Male | YES     | YES   | T2N1M0, IIb  | High               |
| 2       | 58  | Male | YES     | YES   | T3N1M0, IIIa | Middle             |
| 3       | 60  | Male | YES     | YES   | T2N2M0, IIIa | Middle             |
